# Supplementary material for: Effect of ocean acidification on the early life stages of the blue mussel Mytilus edulis
Source: Copernicus journal article supplement (doi:10.5194/bg-7-2051-2010), 2010-07-01
Supplement: Supplementary file 1 [file bg-7-2051-2010-supplement.pdf]

Supplement Table 1: Proportion of embryos that developed to D-shape larvae (Hatching rate; Experiment#1), abundance (Experiment#2) and average larvae shell length during the two experiments (data also presented in Figs. 1 and 2). Average shell thickness has been measured for pediveliger larvae (Experiment#2, day 15 of development) only and data are presented in Fig. 3. Experimental abiotic parameters measured at the time of sampling are also presented. Average values for the triplicates as well as SD are shown. Salinity was measured at the beginning of each incubation period and is presented in Table 1.

| <b>Experiment #1</b> |                        |             |                                             |               |           |        |                                       |            |                                        |            |  |  |
|----------------------|------------------------|-------------|---------------------------------------------|---------------|-----------|--------|---------------------------------------|------------|----------------------------------------|------------|--|--|
| Day                  | pH<br>(N. B. S. scale) |             | Total alkalinity<br>(meq kg <sup>-1</sup> ) |               | Temp (°C) |        | Success D-larvae (%)<br>Hatching rate |            | Average D-veliger shell<br>length (µm) |            |  |  |
|                      | Control                | Low pH      | Control                                     | Low pH        | Control   | Low pH | Control                               | Low pH     | Control                                | Low pH     |  |  |
| 2                    | 8.15 ± 0.00            | 7.81 ± 0.01 | 2.488 ± 0.004                               | 2.489 ± 0.002 | 15.8      | 16.0   | 76.0 ± 2.0                            | 72.3 ± 1.2 | 81.4 ± 0.9                             | 77.7 ± 0.5 |  |  |
| 2                    | 8.09 ± 0.00            | 7.58 ± 0.01 | 2.438 ± 0.002                               | 2.436 ± 0.003 | 15.6      | 15.2   | 75.4 ± 2.5                            | 57.6 ± 1.7 | 80.9 ± 0.4                             | 70.6 ± 0.6 |  |  |

  

| <b>Experiment #2</b> |                        |             |                                             |               |           |        |                                   |             |                              |              |                                 |             |
|----------------------|------------------------|-------------|---------------------------------------------|---------------|-----------|--------|-----------------------------------|-------------|------------------------------|--------------|---------------------------------|-------------|
| Day                  | pH<br>(N. B. S. scale) |             | Total alkalinity<br>(meq kg <sup>-1</sup> ) |               | Temp (°C) |        | Abundance (x10 <sup>6</sup> ind.) |             | Average shell length<br>(µm) |              | Average shell<br>thickness (µm) |             |
|                      | Control                | Low pH      | Control                                     | Low pH        | Control   | Low pH | Control                           | Low pH      | Control                      | Low pH       | Control                         | Low pH      |
| 2                    | 8.02 ± 0.04            | 7.81 ± 0.01 | 2.385 ± 0.001                               | 2.385 ± 0.004 | 19.7      | 19.5   | 1.40 ± 0.01                       | 1.41 ± 0.02 | 78.6 ± 4.5                   | 78.6 ± 4.5   | -                               | -           |
| 6                    | 8.05 ± 0.02            | 7.80 ± 0.01 | 2.396 ± 0.007                               | 2.385 ± 0.001 | 19.8      | 19.5   | 0.99 ± 0.04                       | 0.96 ± 0.05 | 108.2 ± 1.93                 | 103.9 ± 1.97 | -                               | -           |
| 8                    | 8.08 ± 0.01            | 7.77 ± 0.01 | 2.407 ± 0.002                               | 2.413 ± 0.005 | 19.1      | 18.9   | 0.77 ± 0.05                       | 0.78 ± 0.11 | 139.8 ± 0.49                 | 135.2 ± 0.73 | -                               | -           |
| 10                   | 8.01 ± 0.04            | 7.79 ± 0.02 | 2.428 ± 0.007                               | 2.427 ± 0.004 | 19.6      | 19.2   | 0.76 ± 0.04                       | 0.75 ± 0.02 | 165.0 ± 1.87                 | 160.1 ± 1.41 | -                               | -           |
| 13                   | 8.04 ± 0.01            | 7.77 ± 0.05 | 2.441 ± 0.014                               | 2.434 ± 0.005 | 19.4      | 19.0   | 0.74 ± 0.04                       | 0.75 ± 0.07 | 195.6 ± 5.78                 | 182.3 ± 3.57 | -                               | -           |
| 15                   | 7.99 ± 0.01            | 7.71 ± 0.07 | 2.431 ± 0.008                               | 2.426 ± 0.002 | 19.1      | 18.6   | 0.74 ± 0.02                       | 0.74 ± 0.02 | 207.0 ± 4.39                 | 194.6 ± 1.66 | 4.15 ± 0.16                     | 3.65 ± 0.12 |
